# Supplementary material for: An exonuclease III-aided “turn-on” fluorescence assay for mercury ions based on graphene oxide and metal-mediated “molecular beacon”
Source: Royal Society of Chemistry journal article supplement (doi:10.1039/c4ra14024a), 2015-01-01
Supplement: c4ra14024a1.pdf [file c4ra14024a1.pdf]

## Electronic supplementary information

### An Exonuclease III-aided “Turn-on” Fluorescence Assay for Mercury Ions Based on Graphene Oxide and Metal-Mediated “Molecular Beacon”

Ying Zhou, Xiao-jing Xing, Dai-wen Pang, and Hong-wu Tang\*

To whom correspondence should be addressed. Prof. Hong-Wu Tang, E-mail: hwtang@whu.edu.cn (H.-W. T.), Tel: 86-27-68756759, Fax: 86-27-68754067.

Key Laboratory of Analytical Chemistry for Biology and Medicine (Ministry of Education), College of Chemistry and Molecular Sciences, Wuhan Institute of Biotechnology, and State Key Laboratory of Virology, Wuhan University, Wuhan, 430072, P. R. China.

#### *Optimization of the Concentration of GO*

To optimize the concentration of GO, different concentrations of GO were added to 10  $\mu\text{L}$  of the probe stock solution (1.0  $\mu\text{M}$ ) and diluted with 20 mM Tris-HCl (pH 7.5) buffer to 250  $\mu\text{L}$  and incubated 30 min with gentle shake at room temperature. Finally, the fluorescence intensity was measured at 520 nm with excitation at 480 nm.

#### *Optimization of the Concentration of Exo III*

10  $\mu\text{L}$  of the probe stock solution (1.0  $\mu\text{M}$ ) in the absence and presence of 20  $\mu\text{L}$   $\text{Hg}^{2+}$  (45.75  $\mu\text{M}$ ) was incubated for 1 h at 25  $^{\circ}\text{C}$ . Then different concentrations of Exo III solution were added into this mixture, and allowed to incubate for 15 min at 25  $^{\circ}\text{C}$ . Finally, 10  $\mu\text{L}$  of GO (250  $\mu\text{g}/\text{mL}$ ) was added to the above mixture and diluted with 20 mM Tris-HCl buffer to 250  $\mu\text{L}$  and incubated 30 min with gentle shake at room temperature. After that, the fluorescence intensity was measured at 520 nm with excitation at 480 nm.

#### *Optimization of the Reaction Time between MB and Exo III*

To optimize the reaction time between MB and Exo III, 10  $\mu\text{L}$  of the probe stock solution (1.0  $\mu\text{M}$ ), 20  $\mu\text{L}$  of  $\text{Hg}^{2+}$  (45.75  $\mu\text{M}$ ) were mixed, and was incubated for 1 h at 25  $^{\circ}\text{C}$ . Then 0.5 U of Exo III solution was added into this mixture, and allowed to incubate for different

time (0, 10, 20, 30, 40, 50 min) at 25 °C. Finally, 10 µL of GO (250 µg/mL) was added to the above mixture and diluted with 20 mM Tris-HCl buffer to 250 µL and incubated 30 min with gentle shake at room temperature. After that, the fluorescence intensity was measured at 520 nm with excitation at 480 nm.

*Optimization of the Reaction Temperature between MB and Exo III*

To optimize the reaction temperature between the probe and Exo III, 10 µL of the probe stock solution (1.0 µM), 20 µL of Hg<sup>2+</sup> (45.75 µM) were mixed, and incubated for 1 h at 25 °C. Then 0.5 U of Exo III solution was added into this mixture, and allowed to incubate for 15 min at different temperatures. Finally, 10 µL of GO (250 µg/mL) was added to the above mixture and diluted with 20 mM Tris-HCl buffer to 250 µL and incubated 30 min with gentle shake at room temperature. After that, the fluorescence intensity was measured at 520 nm with excitation at 480 nm.

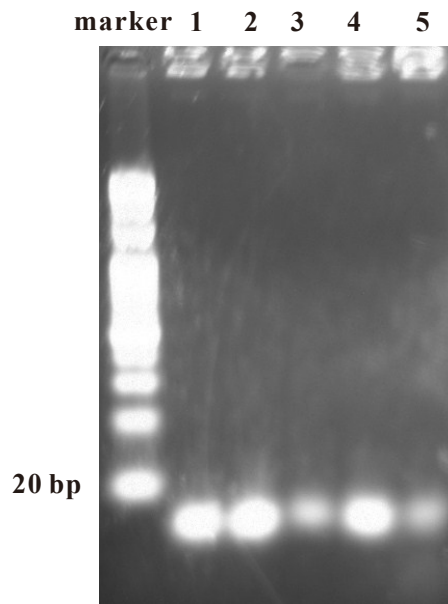

**Fig. S1** Image of the gel electrophoresis to verify the Amplified Mechanism of Exo III:

Lane 1: 3.3  $\mu\text{M}$  MB; Lane 2: 3.3  $\mu\text{M}$  MB + 6 U Exo III, enzyme reaction time: 10 min;

Lane 3: 3.3  $\mu\text{M}$  MB + 15.25  $\mu\text{M}$   $\text{Hg}^{2+}$  + 6 U Exo III, enzyme reaction time:10 min; Lane

4: 3.3  $\mu\text{M}$  MB + 0.61  $\mu\text{M}$   $\text{Hg}^{2+}$  + 6 U Exo III, enzyme reaction time:10 min; Lane 5: 3.3

$\mu\text{M}$  MB + 0.61  $\mu\text{M}$   $\text{Hg}^{2+}$  + 6 U Exo III, enzyme reaction time:70 min

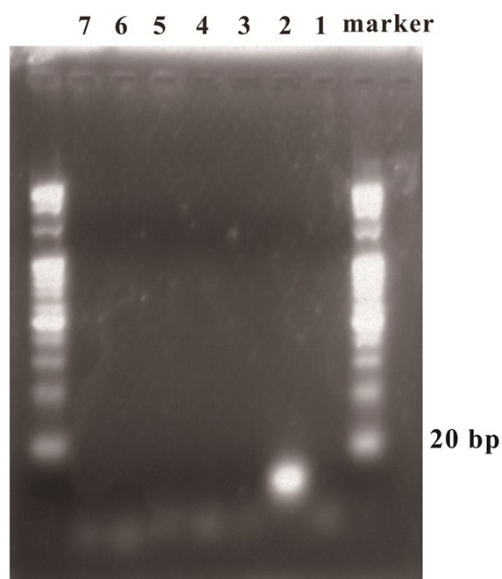

**Fig. S2** Exo III Activity on DNA Duplex with T-Hg<sup>2+</sup>-T Base Pairs: Lane 1: 3.33  $\mu$ M DNA 2 + 7.625  $\mu$ M Hg<sup>2+</sup> ; Lane 2: 1.67  $\mu$ M DNA 1 + 1.67  $\mu$ M DNA 2 + 7.625  $\mu$ M Hg<sup>2+</sup>; Lane 3: 1.67  $\mu$ M DNA 1 + 1.67  $\mu$ M DNA 2 + 6 U Exo III + 7.625  $\mu$ M Hg<sup>2+</sup>; Lane 4: 1.67  $\mu$ M DNA 3 + 1.67  $\mu$ M DNA 1 + 6 U Exo III + 7.625  $\mu$ M Hg<sup>2+</sup>; Lane 5: 1.67  $\mu$ M DNA 4 + 1.67  $\mu$ M DNA 1 + 6 U Exo III + 7.625  $\mu$ M Hg<sup>2+</sup>; Lane 6: 1.67  $\mu$ M DNA 5 + 1.67  $\mu$ M DNA 1 + 6 U Exo III + 7.625  $\mu$ M Hg<sup>2+</sup>; Lane 7: 1.67  $\mu$ M DNA 6 + 1.67  $\mu$ M DNA 1 + 6 U Exo III + 7.625  $\mu$ M Hg<sup>2+</sup>.

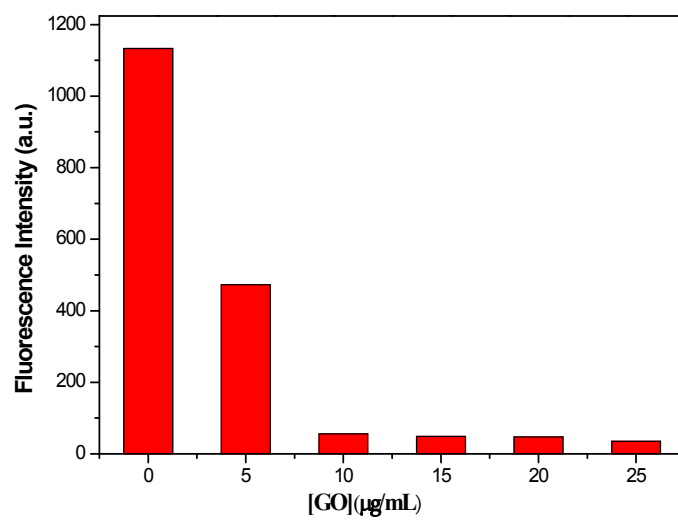

**Fig. S3** Fluorescence spectra of MB under different concentrations of GO

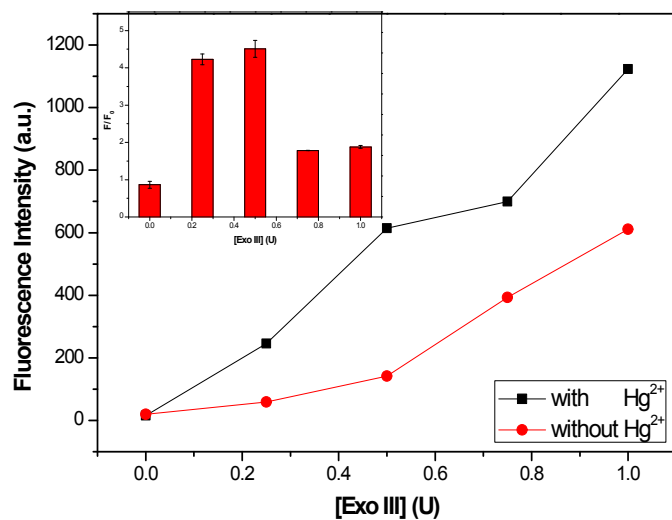

**Fig. S4** Fluorescence intensity of MB in the absence and presence of  $Hg^{2+}$  upon the addition of different concentrations of Exo III. Inset: Relative fluorescence intensity versus concentrations of Exo III, where  $F_0$  and  $F$  are the fluorescence intensities in the absence and presence of  $Hg^{2+}$ , respectively.

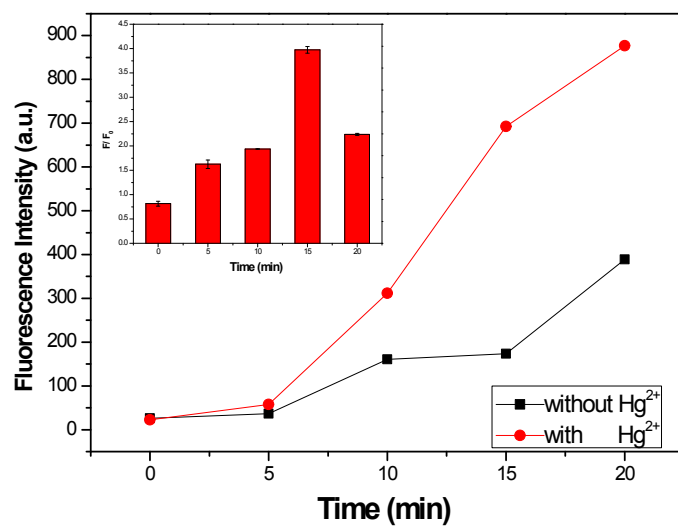

**Fig. S5** Fluorescence intensity in the absence and presence of Hg<sup>2+</sup> upon different reaction time between MB and Exo III. Inset: Relative fluorescence intensity versus reaction time between MB and Exo III, where  $F_0$  and  $F$  are the fluorescence intensities in the absence and presence of Hg<sup>2+</sup>, respectively.

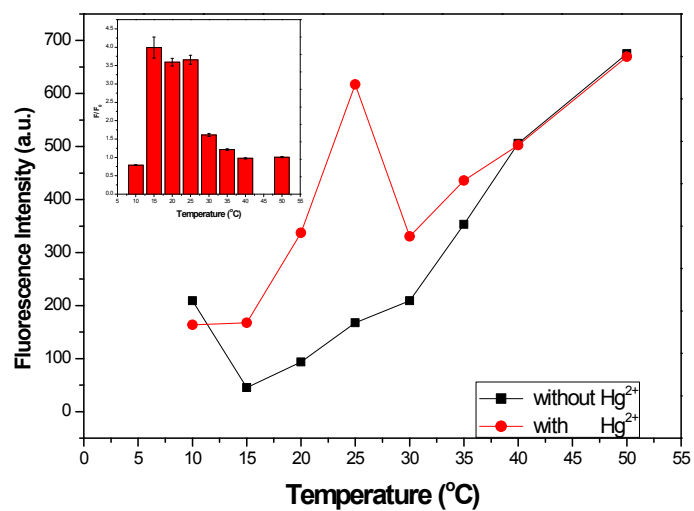

**Fig. S6** The change of fluorescence intensity of MB in the absence and presence of Hg<sup>2+</sup> under different reaction temperatures between MB and Exo III. Inset: Relative fluorescence intensities of MB under different reaction temperatures between MB and Exo III, where  $F_0$  and  $F$  are the fluorescence intensities in the absence and presence of Hg<sup>2+</sup> under different reaction



**Table S1** DNA sequences used in the experiment

| Designation | Sequence (5' to 3')                          |
|-------------|----------------------------------------------|
| MB          | ACA CTGTAAAA AAA AAA AAA<br>AACACTGT (FAM) G |
| DNA 1       | GGTGTTC                                      |
| DNA 2       | GGAAATCACCAAAAAA                             |
| DNA 3       | GGAAATCTCCAAAAAA                             |
| DNA 4       | GGAATTCACCAAAAAA                             |
| DNA 5       | GGATTCACCAAAAAA                              |
| DNA 6       | GGTTTCACCAAAAAA                              |
